# Supplementary material for: Carbohydrate–metallocene conjugates: selective formation of a zirconadioxacyclopentane-type dimer from the reaction of a bis(enolate)ZrCp2reagent with a glucofuranoside derivative
Source: Royal Society of Chemistry journal article supplement (doi:10.1039/b603803d), 2006-01-01
Supplement: b603803d.pdf [file b603803d.pdf]

# Carbohydrate-metallocene conjugates: selective formation of a zirconadioxacyclopentane-type dimer from the reaction of a bis(enolate)ZrCp<sub>2</sub> reagent with a glucofuranoside derivative

Birgit Meyer zu Berstenhorst<sup>a</sup>, Gerhard Erker<sup>\*a</sup>, Gerald Kehr<sup>a</sup> and Roland Fröhlich<sup>a,b</sup>

<sup>5</sup> *Receipt/Acceptance Data* [DO NOT ALTER/DELETE THIS TEXT]

*Publication data* [DO NOT ALTER/DELETE THIS TEXT]

DOI: 10.1039/b000000x [DO NOT ALTER/DELETE THIS TEXT]

## Supporting Information:

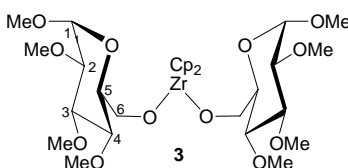

10

Preparation of **3**: A solution of 1,2,3,4-*O*-tetramethyl- $\alpha$ -D-glucopyranoside [**2**, 470 mg (2.00 mmol)] in 30 mL of dry dichloromethane was added dropwise with stirring to a solution of 335 mg (1.00 mmol) of bis(2-propenolato)ZrCp<sub>2</sub> (**1**) in 30 ml CH<sub>2</sub>Cl<sub>2</sub> at room temperature. After 2h the solvent was removed in vacuo, the residue washed with pentane and dried in vacuo to yield 600 mg (86%) of **3** as an off white solid, m.p. (decomp.) 171 °C (DSC), [ $\alpha$ ]<sub>D</sub><sup>25</sup> = +121 (c=0.24, CH<sub>2</sub>Cl<sub>2</sub>). Anal. calcd. for C<sub>30</sub>H<sub>48</sub>O<sub>12</sub>Zr (691.9): 52.08% C, 6.99% H, found: 51.77% C, 7.09% H. IR (KBr):  $\tilde{\nu}$  = 3083, 2974, 2926, 2878, 2835, 2700, 2087, 1735, 1652, 1561, 1439, 1365, 1265, 1161, 1100, 1035, 1009, 896, 796, 709, 583, 513, 478 cm<sup>-1</sup>.

<sup>1</sup>H NMR (CD<sub>2</sub>Cl<sub>2</sub>, 298 K, 600 MHz):  $\delta^1\text{H}$  = 6.32 (s, 10H, Cp); 4.81 (d, <sup>3</sup>J<sub>1,2</sub> = 3.5 Hz, 2H, 1-H); 4.05 (dd(ABM), <sup>2</sup>J = 11.8 Hz, <sup>3</sup>J<sub>6,5</sub> = 3.4 Hz, 2H, 6-H); 4.02 (dd, <sup>2</sup>J = 11.8 Hz, <sup>3</sup>J<sub>6',5}</sub> = 2.3 Hz, 2H, 6-H'); 3.56 (s, 6H, 3-OCH<sub>3</sub>); 3.53 (s, 6H, 4-OCH<sub>3</sub>); 3.46 (s, 6H, 2-OCH<sub>3</sub>); 3.41 (m, 2H, 3-H); 3.39 (s, 6H, 1-OCH<sub>3</sub>); 3.32 (ddd, <sup>3</sup>J<sub>5,4</sub> = 9.9 Hz, <sup>3</sup>J<sub>5,6</sub> = 3.4 Hz, <sup>3</sup>J<sub>5,6'</sub> = 2.3 Hz, 2H, 5-H); 3.14 (dd, <sup>3</sup>J<sub>2,3</sub> = 9.6 Hz, <sup>3</sup>J<sub>2,1</sub> = 3.5 Hz, 2H, 2-H); 3.06 (dd, <sup>3</sup>J<sub>4,5</sub> = 9.9 Hz, <sup>3</sup>J<sub>4,3</sub> = 9.0 Hz, 2H, 4-H). <sup>13</sup>C{<sup>1</sup>H} NMR (CD<sub>2</sub>Cl<sub>2</sub>, 298 K, 151 MHz):  $\delta^{13}\text{C}$  = 112.3 (Cp); 97.4 (C-1); 83.8 (C-3); 82.3 (C-2); 79.7 (C-4); 73.0 (C-5); 72.2 (C-6); 60.7 (3-OCH<sub>3</sub>); 60.4 (4-OCH<sub>3</sub>); 58.6 (2-OCH<sub>3</sub>); 55.1 (1-OCH<sub>3</sub>). <sup>1</sup>H / <sup>13</sup>C ghsqc (CD<sub>2</sub>Cl<sub>2</sub>, 298 K, 600 MHz / 151 MHz):  $\delta^1\text{H} / \delta^{13}\text{C}$  = 6.32 / 112.3 (Cp); 4.81 / 97.4 (1-H / C-1); 4.05, 4.02 / 72.2 (6-H, 6-H' / C-6); 3.56 / 60.7 (3-OCH<sub>3</sub>); 3.53 / 60.4 (4-OCH<sub>3</sub>); 3.46 / 58.6 (2-OCH<sub>3</sub>); 3.41 / 83.8 (3-H / C-3); 3.39 / 55.1 (1-OCH<sub>3</sub>); 3.32 / 73.0 (5-H / C-5); 3.14 / 82.3 (2-H / C-2); 3.06 / 79.7 (4-H / C-4). <sup>1</sup>H / <sup>13</sup>C ghmbc (CD<sub>2</sub>Cl<sub>2</sub>, 298 K, 600 MHz / 151 MHz):  $\delta^1\text{H} / \delta^{13}\text{C}$  = 6.32 / 112.3 (Cp / Cp); 4.81 / 83.8, 73.0, 55.1 (1-H / C-3, C-5, 1-OCH<sub>3</sub>); 4.05 / 79.7, 73.0 (6-H / C-4, C-5); 3.56 / 83.8 (3-OCH<sub>3</sub> / C-3); 3.53 / 79.7 (4-OCH<sub>3</sub> / C-4); 3.46 / 82.3 (2-OCH<sub>3</sub> / C-2); 3.41 / 97.4, 82.3, 79.7, 60.7 (3-H / C-1, C-2, C-4, 3-OCH<sub>3</sub>); 3.14 / 83.8, 58.6 (2-H / C-3, 2-OCH<sub>3</sub>); 3.06 / 83.8, 73.0, 72.2, 60.4 (4-H / C-3, C-5, C-6, 4-OCH<sub>3</sub>).

Crystal data for (C<sub>15</sub>H<sub>24</sub>O<sub>6</sub>)<sub>2</sub>Zr (**3**), *M* = 691.90, monoclinic, space group C2 (No. 5), *a* = 18.157(1), *b* = 11.380(1), *c* = 8.664(1) Å,  $\beta$  = 109.32(1)°, *V* = 1689.4(3) Å<sup>3</sup>, *D*<sub>c</sub> = 1.360 g cm<sup>-3</sup>,  $\mu$  = 0.383 cm<sup>-1</sup>, *Z* = 2,  $\lambda$  = 0.71073 Å, *T* = 198 K, 5832 reflections collected ( $\pm h$ ,  $\pm k$ ,  $\pm l$ ), [(sin $\theta$ )/ $\lambda$ ] = 0.67 Å<sup>-1</sup>, 3534 independent (*R*<sub>int</sub> = 0.024) and 3379 observed reflections [*I* ≥ 2  $\sigma$ (*I*)], 199 refined parameters, *R* = 0.036, *wR*<sup>2</sup> = 0.064.

<sup>a</sup> Organisch-Chemisches Institut der Universität Münster; Corrensstrasse 40; 48149 Münster; Germany; Fax: +49 251 83 36503; E-mail: erker@uni-muenster.de

<sup>b</sup> X-ray crystal structure analysis

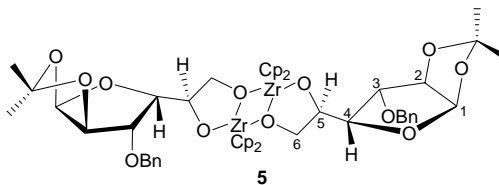

- 35 Preparation of **5**: Analogous procedure as described for **3**: 372 mg (1.20 mmol) of 3-*O*-benzyl-1,2-*O*-isopropylidene-glucofuranoside (**4**) was reacted with 403 mg (1.20 mmol) of bis(2-propenolato)-zirconocene (**1**) to give 623 mg (90%) of **5** as a slightly yellowish solid, m.p. 274°C (DSC),  $[\alpha]_D^{25} = -26.5$  ( $c=0.29$ ,  $\text{CH}_2\text{Cl}_2$ ), Anal. calcd. for  $\text{C}_{52}\text{H}_{60}\text{O}_{12}\text{Zr}_2$  (1059.5): 58.95% C, 5.71% H, found: 58.87% C, 5.81% H. IR (KBr):  $\tilde{\nu} = 3083, 2987, 2930, 2852, 1713, 1544, 1500, 1457, 1374, 1213, 1165, 1074, 1013, 804, 736, 700, 587, 544 \text{ cm}^{-1}$ .
- 40  $^1\text{H}$  NMR ( $\text{CD}_2\text{Cl}_2$ , 298 K, 600 MHz):  $\delta^1\text{H} = 7.49$  (pd (AA'BB'C), 2H, o-Ph); 7.40 (pt (AA'BB'C), 2H, m-Ph); 7.32 (pt (AA'BB'C), 1H, p-Ph); 6.18 (s, 5H,  $\text{Cp}_A$ ); 6.10 (s, 5H,  $\text{Cp}_B$ ); 5.91 (d,  $^3J_{1,2} = 3.8 \text{ Hz}$ , 1H, 1-H); 4.79 (AB,  $^2J = 12.3 \text{ Hz}$ , 1H, 3-OCH<sub>2</sub>Ph); 4.70 (AB,  $^2J = 12.3 \text{ Hz}$ , 1H, 3-OCH<sub>2</sub>Ph); 4.61 (d,  $^3J_{2,1} = 3.8 \text{ Hz}$ , 1H, 2-H); 4.09 (ddd,  $^3J_{5,6} = 9.9 \text{ Hz}$ ,  $^3J_{5,4} = 8.6 \text{ Hz}$ ,  $^3J_{5,6} = 4.3 \text{ Hz}$ , 1H, 5-H); 4.05 (d,  $^3J_{3,4} = 3.3 \text{ Hz}$ , 1H, 3-H); 3.92 (dd,  $^2J = 8.6 \text{ Hz}$ ,  $^3J_{6,5} = 4.3 \text{ Hz}$ , 1H, 6-H); 3.84 (dd,  $^3J_{4,5} = 8.6 \text{ Hz}$ ,  $^3J_{3,4} = 3.3 \text{ Hz}$ , 1H, 4-H); 3.48 (dd,  $^3J_{6,5} = 9.9 \text{ Hz}$ ,  $^2J = 8.6 \text{ Hz}$ , 1H, 6-H'); 1.51 (s, 3H, CH<sub>3</sub> (endo)); 1.32 (s, 3H, CH<sub>3</sub> (exo)).  $^{13}\text{C}\{^1\text{H}\}$  NMR ( $\text{CD}_2\text{Cl}_2$ , 298 K, 151 MHz):  $\delta^{13}\text{C} = 138.3$  (ipso-Ph); 128.8 (m-Ph); 128.0 (o-Ph, p-Ph); 113.0 ( $\text{Cp}_A$ ); 111.7 ( $\underline{\text{C}}(\text{CH}_3)_2$ ); 111.6 ( $\text{Cp}_B$ ); 105.9 (C-1); 84.2 (C-4); 82.1 (C-3); 82.0 (C-2); 78.9 (C-6); 74.4 (C-5); 71.8 (3-OCH<sub>2</sub>Ph); 26.9 (CH<sub>3</sub> (endo)); 26.3 (CH<sub>3</sub> (exo)).  $^1\text{H} / ^{13}\text{C}$  ghsqc ( $\text{CD}_2\text{Cl}_2$ , 298 K, 600 MHz / 151 MHz):  $\delta^1\text{H} / \delta^{13}\text{C} = 7.49, 7.32 / 128.0$  (o-Ph, p-Ph); 7.40 / 128.8 (m-Ph); 6.18 / 113.0 ( $\text{Cp}_A$ ); 6.10 / 111.6 ( $\text{Cp}_B$ ); 5.91 / 105.9 (1-H / C-1); 4.79, 4.70 / 71.8 (3-OCH<sub>2</sub>Ph); 4.61 / 82.0 (2-H / C-2); 4.09 / 74.4 (5-H / C-5); 4.05 / 82.1 (3-H / C-3); 3.92, 3.48 / 78.9 (6-H, 6-H' / C-6); 3.84 / 84.2 (4-H / C-4); 1.51 / 26.9 (CH<sub>3</sub> (endo)); 1.32 / 26.3 (CH<sub>3</sub> (exo)).  $^1\text{H} / ^{13}\text{C}$  ghmbc ( $\text{CD}_2\text{Cl}_2$ , 298 K, 600 MHz / 151 MHz):  $\delta^1\text{H} / \delta^{13}\text{C} = 7.49 /$
- 50 128.0, 71.8 (o-Ph / o-Ph, p-Ph, 3-OCH<sub>2</sub>Ph); 7.40 / 128.0, 71.8 (m-Ph / o-Ph, p-Ph, 3-OCH<sub>2</sub>Ph); 6.18 / 113.0 ( $\text{Cp}_A / \text{Cp}_A$ ); 6.10 / 111.6 ( $\text{Cp}_B / \text{Cp}_B$ ); 5.91 / 111.7, 84.2, 82.2, 82.0 (1-H /  $\underline{\text{C}}(\text{CH}_3)_2$ , C-4, C-3, C-2); 4.79 / 138.3, 128.0, 82.1 (3-OCH<sub>2</sub>Ph / ipso-Ph, o-Ph, C-3); 4.70 / 138.3, 128.0, 82.1 (3-OCH<sub>2</sub>Ph / ipso-Ph, o-Ph, C-3); 4.61 / 105.9, 84.2 (2-H / C-1, C-4); 4.09 / 84.2 (5-H / C-6); 4.05 / 105.9, 84.2, 82.0, 71.8 (3-H / C-1, C-4, C-2, 3-OCH<sub>2</sub>Ph); 3.92 / 111.682.1, 74.4 (6-H /  $\text{Cp}_B$ , C-4, C-5); 3.84 / 82.1, 78.9, 74.4 (4-H / C-3, C-6, C-5); 3.48 / 82.1, 74.4 (6-H' / C-4, C-5); 1.51 / 111.7, 26.3 (CH<sub>3</sub> (endo) /  $\underline{\text{C}}(\text{CH}_3)_2$ , CH<sub>3</sub> (exo)); 1.32 / 111.7, 26.9 (CH<sub>3</sub> (exo) /  $\underline{\text{C}}(\text{CH}_3)_2$ , CH<sub>3</sub> (endo)).  $^{13}\text{C}\{\text{apt}\}$  ( $\text{CD}_2\text{Cl}_2$ , 248 K, 150.8 MHz):  $\delta^{13}\text{C}_{\text{up}} = 128.8$  (CH, m-Ph); 128.0 (CH, o-Ph, p-Ph); 113.0 (CH,  $\text{Cp}_A$ ); 111.6 (CH,  $\text{Cp}_B$ ); 105.9 (CH, C-1); 84.2 (CH, C-4); 82.1 (CH, C-3); 82.0 (CH, C-2); 74.4 (CH, C-5); 26.9 (CH<sub>3</sub>, CH<sub>3</sub> (endo)); 26.3 (CH<sub>3</sub>, CH<sub>3</sub> (exo)).  $\delta^{13}\text{C}_{\text{down}} = 138.3$  (C, ipso-Ph); 111.7 (C,  $\underline{\text{C}}(\text{CH}_3)_2$ ); 78.9 (CH<sub>2</sub>, C-6); 71.8 (CH<sub>2</sub>, 3-OCH<sub>2</sub>Ph).  $^1\text{H}\{^1\text{H}, \text{noe}\}$  ( $\text{CD}_2\text{Cl}_2$ , 298 K, 599.8 MHz):  $\delta^1\text{H}_{(\text{irr})} / \delta^1\text{H}_{(\text{res})} = 6.18 / 3.48$  ( $\text{Cp}_A / 6\text{-H}'$ ); 6.10 / 7.49, 4.09, 3.92 ( $\text{Cp}_B / \text{o-Ph}$ , 5-H, 6-H); 4.61 / 7.49, 5.91, 4.79, 4.70, 4.05, 1.32 (H-2 / o-Ph, 1-H, 3-OCH<sub>2</sub>Ph, 3-OCH<sub>2</sub>Ph, 3-H, CH<sub>3</sub> (exo)); 1.51 / 3.84 (CH<sub>3</sub> (endo) / 4-H); 1.32 / 5.91, 4.61 (CH<sub>3</sub> (exo) / 1-H, 2-H).
- 60 Crystal data for  $(\text{C}_{26}\text{H}_{30}\text{O}_6\text{Zr})_2 \cdot \text{C}_7\text{H}_8$  (**5**),  $M = 1151.57$ , orthorhombic, space group  $P2_12_12_1$  (No. 19),  $a = 9.213(1)$ ,  $b = 19.258(1)$ ,  $c = 30.126(1) \text{ \AA}$ ,  $V = 5345.1(7) \text{ \AA}^3$ ,  $D_c = 1.431 \text{ g cm}^{-3}$ ,  $\mu = 0.453 \text{ mm}^{-1}$ ,  $Z = 4$ ,  $\lambda = 0.71073 \text{ \AA}$ ,  $T = 198 \text{ K}$ , 42406 reflections collected ( $\pm h, \pm k, \pm l$ ),  $[(\sin\theta)/\lambda] = 0.62 \text{ \AA}^{-1}$ , 10820 independent ( $R_{\text{int}} = 0.076$ ) and 8818 observed reflections [ $I \geq 2 \sigma(I)$ ], 651 refined parameters,  $R = 0.048$ ,  $wR^2 = 0.083$ .
